# Supplementary material
Source: ML conference proceedings conference paper supplement (https://proceedings.mlr.press/v161/triantafillou21a.html)
Supplement: Supplementary file [file triantafillou21a-supp.pdf]

## Causal and Interventional Markov Boundaries (Supplementary Material)

Sofia Triantafillou<sup>1</sup>

Fattaneh Jabbari<sup>1</sup>

Gregory F. Cooper<sup>1</sup>

<sup>1</sup>Department of Biomedical Informatics, University of Pittsburgh, Pittsburgh, Pennsylvania, USA

Table S1: Closed-form solutions for Eq. 4 -8 in the main paper, for multinomial distributions with Dirichlet priors. Subscript  $jk$  refers variable  $Y$  taking its  $k$ -th configuration, and variable  $Z$  taking its  $j$ -th configuration.  $\alpha_{jk}$  is the prior for the Dirichlet distribution. We set  $\alpha_{jk} = 1$  in all experiments.  $N_{jk}^o, N_{jk}^e$  corresponds to counts in the data where  $Y = k$  and  $Z = j$  in  $D_o$  and  $D_e$ , respectively.  $N_j^o, N_j^e$  corresponds to counts in the data where  $Z = j$ . Tilde notation corresponds to the OMB  $\mathbf{U}$ .

| Eq. number     | Analytical Expression                                                                                                                                                                                                                  |
|----------------|----------------------------------------------------------------------------------------------------------------------------------------------------------------------------------------------------------------------------------------|
| Eq. 5          | $P(D_e D_o, H_{\mathbf{Z}}^c) = \prod_{j=1}^q \frac{\Gamma(\alpha_j + N_j^o)}{\Gamma(\alpha_j + N_j^o + N_j^e)} \prod_{k=1}^r \frac{\Gamma(\alpha_{jk} + N_{jk}^o + N_{jk}^e)}{\Gamma(\alpha_{jk} + N_{jk}^o)}$                        |
| -              | $P(D_e D_o, H_{\mathbf{Z}}^{\bar{c}}) = \prod_{j=1}^q \frac{\Gamma(\alpha_j)}{\Gamma(\alpha_j + N_j^e)} \prod_{k=1}^r \frac{\Gamma(\alpha_{jk} + N_{jk}^e)}{\Gamma(\alpha_{jk})}$                                                      |
| Eq. 7          | $P(D_o H_{\mathbf{Z}}^c) = \prod_{j=1}^{\tilde{q}} \frac{\Gamma(\tilde{\alpha}_j)}{\Gamma(\tilde{\alpha}_j + \tilde{N}_j^o)} \prod_{k=1}^r \frac{\Gamma(\tilde{\alpha}_{jk} + \tilde{N}_{jk}^o)}{\Gamma(\tilde{\alpha}_{jk})}$         |
| Eq. 7          | $P(D_o H_{\mathbf{Z}}^{\bar{c}}) = \prod_{j=1}^{\tilde{q}} \frac{\Gamma(\tilde{\alpha}_j)}{\Gamma(\tilde{\alpha}_j + \tilde{N}_j^e)} \prod_{k=1}^r \frac{\Gamma(\tilde{\alpha}_{jk} + \tilde{N}_{jk}^e)}{\Gamma(\tilde{\alpha}_{jk})}$ |
| Terms in Eq. 8 | $P(Y = k x, Z = j, D_e, D_o, H_{\mathbf{Z}}^c) = \frac{N_{jk}^o + N_{jk}^e + \alpha_{jk}}{N_j^o + N_j^e + \alpha_j}$                                                                                                                   |
| Terms in Eq. 8 | $P(Y = k x, Z = j, D_e, D_o, H_{\mathbf{Z}}^{\bar{c}}) = \frac{N_{jk}^e + \alpha_{jk}}{N_j^e + \alpha_j}$                                                                                                                              |

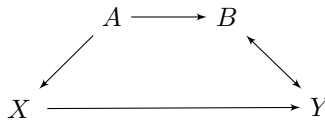

Figure S1: An example where a CMB does not necessarily correspond to an optimal adjustment set [Henckel et al., 2019].  $\text{CMB}_X(Y) = \{\{X, A, B\}\}$ , but the optimal adjustment set depends on the parameters.

# 1 PROOFS

In this section, we provide a proof that every causal Markov boundary is backdoor set, which is defined below (Definition 1.1). We make the following assumptions throughout the entire document:

- $X$  causes  $Y$
- all variables  $\mathbf{V}$  are pre-treatment.

*Definition 1.1* (Backdoor Set).  $\mathbf{Z}$  is a backdoor set for  $X, Y$  if and only if  $\mathbf{Z}$  m-separates  $X$  and  $Y$  in  $\mathcal{G}_{\underline{X}}$ .

We use the following definitions from [Shpitser and Pearl, 2006]:

*Definition 1.2* (C-component). A C-component is a set of nodes  $S$  in  $\mathcal{G}$  where every two nodes are connected by a bidirected path.

*Definition 1.3* (C-forest). A graph  $\mathcal{G}$  where the set of all of its nodes is a C-component, and each node has at most one child is a C-forest. The set of nodes  $\mathbf{R}$  without children in the C-forest is called the root, and we say that  $\mathcal{G}$  is an  $\mathbf{R}$ -rooted C-forest.

C-forests are useful for defining hedges:

*Definition 1.4* (hedge). Let  $\mathbf{X}, \mathbf{Y}$  be sets of variables in  $\mathcal{G}$ . Let  $F, F'$  be  $\mathbf{R}$ -rooted C-forests in  $\mathcal{G}$  such that  $F'$  is a subgraph of  $F$ ,  $\mathbf{X}$  only occurs in  $F$ , and  $\mathbf{R} \in An(\mathbf{Y})_{\mathcal{G}_{\underline{X}}}$ . Then  $F, F'$  form a hedge for  $P(\mathbf{Y}|do(\mathbf{X}))$ .

The existence of a hedge for  $P(\mathbf{Y}|do(\mathbf{X}))$  in  $\mathcal{G}$  is equivalent to the non-identifiability of  $P(\mathbf{Y}|do(\mathbf{X}))$  (see Theorem 4 in [Shpitser and Pearl, 2006]).

**Lemma 1.5.** *Let  $\mathbf{Z}$  be a set that is not a subset of any backdoor set (i.e., there exists no set  $\mathbf{Q} \subseteq (\mathbf{V} \setminus \mathbf{Z})$  such that  $\mathbf{Q} \cup \mathbf{Z}$  m-separates  $X$  and  $Y$  in  $\mathcal{G}_{\underline{X}}$ ). Then there exists in  $\mathcal{G}$  a bi-directed path from  $X$  to  $Y$  where every collider has a descendant in  $\mathbf{Z} \cup Y$ .*

*Proof.* The proof is a special case of Theorem 4.2 (iv)  $\Rightarrow$  (ii) in [Richardson et al., 2002] with  $\mathbf{S} \leftarrow \mathbf{Z}, \mathbf{L} \leftarrow \emptyset, \mathcal{G} \leftarrow \mathcal{G}_{\underline{X}}$ . The proof is for ancestral graphs, but it is straightforward to show that it holds for SMCMs, given that every SMCM  $\mathcal{G}$  can be transformed to a maximal ancestral graph  $\mathcal{M}$  over the same nodes (by adding some edges) such that (a)  $\mathcal{G}$  and  $\mathcal{M}$  entail the exact same m-separations and m-connections and (b) the exact same ancestral relationships hold in both graphs. The theorem proves that if  $\forall \mathbf{Q} \subseteq (\mathbf{V} \setminus \mathbf{Z}), \mathbf{Z} \cup \mathbf{Q}$  do not m-separate  $X$  and  $Y$  in  $\mathcal{G}_{\underline{X}}$ , then there exists a bidirected path between  $X$  and  $Y$  in  $\mathcal{G}_{\underline{X}}$  where every variable is an ancestor of some variables in  $\mathbf{Z} \cup \{X, Y\}$ , which means that there exists a path in  $\mathcal{G}$  a bi-directed path from  $X$  to  $Y$  where every collider has a descendant in  $\mathbf{Z} \cup Y$  (since  $X \rightarrow Y$  by assumption).  $\square$

**Lemma 1.6.** *Let  $\mathbf{Z}$  be a set for which  $P(Y|do(X), \mathbf{Z})$  is identifiable from  $P(Y|X, \mathbf{Z})$ , then  $\mathbf{Z}$  is a subset of a backdoor set.*

*Proof.* First, notice that  $P(Y|do(X), \mathbf{Z}) = \frac{P(Y, \mathbf{Z}|do(X))}{P(\mathbf{Z}|do(X))} = \frac{P(Y, \mathbf{Z}|do(X))}{P(\mathbf{Z})}$ . Therefore  $P(Y|do(X), \mathbf{Z})$  is only identifiable if  $P(Y, \mathbf{Z}|do(X))$  is identifiable. If  $\mathbf{Z}$  is not a subset of a backdoor set, then there exists a bidirected path where every variable has a descendant in  $\mathbf{Z} \cup Y$  in  $\mathcal{G}$  by Lemma 1.5. Let  $\mathcal{F}$  be the graph consisting of the bidirected path, and  $\mathcal{F}'$  be the same graph without  $X$ . Then  $\mathcal{F}, \mathcal{F}'$  are  $\{Y, \mathbf{Z}\}$  rooted C-forests, and  $\{Y, \mathbf{Z}\} \in An(\{Y, \mathbf{Z}\})$ , so  $\mathcal{F}, \mathcal{F}'$  form a hedge for  $\{Y, \mathbf{Z}\}$ . Therefore,  $P(Y, \mathbf{Z}|do(X))$  is not identifiable, and  $P(Y|do(X), \mathbf{Z})$  is not identifiable.  $\square$

**Theorem 3.3.** *We assume that  $P_x$  and  $\mathcal{G}_{\underline{X}}$  are faithful to each other. If  $\mathbf{Z}$  is a causal Markov boundary for  $Y$  relative to  $X$ , then  $\mathbf{W} = \mathbf{Z} \setminus X$  is a backdoor set.*

*Proof.* Assume  $\mathbf{Z}$  is a causal Markov boundary, but  $\mathbf{W}$  is not a backdoor set. Since  $P(Y|do(X), \mathbf{W})$  is identifiable, by Lemma 1.6  $\mathbf{W}$  is a subset of a backdoor set  $\mathbf{W} \cup \mathbf{Q}$ , where  $\mathbf{Q} \subseteq (\mathbf{V} \setminus \mathbf{W})$ . Since by assumption  $\mathbf{W}$  is not a backdoor set,  $\mathbf{Q}$  is not the empty set (i.e.,  $\mathbf{W}$  is a proper subset of a backdoor set). We will show that  $P(Y|do(X), \mathbf{W}, \mathbf{Q}) \neq P(Y|do(X), \mathbf{W})$ . To show that, we only need to show that  $\mathbf{Q}$  is not independent from  $\mathbf{W}$  in  $\mathcal{G}_{\underline{X}}$ . Since  $\mathbf{W}$  is not a backdoor set, there exists a backdoor path from  $X$  to  $Y$  that is m-connecting given  $\mathbf{W}$ , but blocked given  $\mathbf{W} \cup \mathbf{Q}$ . Thus, some  $Q \in \mathbf{Q}$  is a non-collider on that path, therefore  $\mathbf{Q}$  are not independent with  $Y$  given  $\mathbf{W}$ . Hence,  $P(Y|do(X), \mathbf{W}, \mathbf{Q}) \neq P(Y|do(X), \mathbf{W})$  and therefore  $\mathbf{Z}$  does not satisfy Condition (2), and  $\mathbf{Z}$  is not a causal Markov boundary (Contradiction).  $\square$

**Lemma 1.7.** Let  $\mathbf{Z} \subseteq \mathbf{V}$  be a backdoor set for  $X, Y$ , and let  $Q \in (\mathbf{Z} \setminus \text{MB}(Y))$  that has an  $m$ -connecting path  $Q\pi_{QY}Y$  with  $Y$  given  $\mathbf{Z} \setminus Q$ . Then there exists a variable  $W \in (\text{MB}(Y) \setminus \mathbf{Z})$  such that:  $W \cup \mathbf{Z}$  is a backdoor set and  $W \not\perp\!\!\!\perp Y | \mathbf{Z}$  in  $\mathcal{G}_{\overline{X}}$ .

*Proof.* Let  $Q$  be a variable as described above. Then there exists a variable  $W \in \text{MB}(Y)$  between  $Q$  and  $Y$  that is a non-collider on  $\pi$ , otherwise  $Q \in \text{Pa}(\text{Dis}(Y))$ , and therefore  $Q \in \text{MB}(Y)$ . In addition,  $W \notin \mathbf{Z}$ , otherwise  $Q\pi_{QY}Y$  would be blocked given  $\mathbf{Z} \setminus Q$ . We will now show, by contradiction, that adding  $W$  to the conditioning set  $\mathbf{Z}$  does not open any backdoor paths from  $X$  to  $Y$ ; hence,  $\mathbf{Z} \cup W$  is a backdoor set.

Assume that conditioning on  $W$  opens a path  $\pi_{XY}$  between  $X$  and  $Y$  that is blocked given just  $\mathbf{Z}$ . Then  $W$  must be a descendant of one or more colliders on that path. Let  $C$  be the collider closest to  $X$  on  $\pi_{XY}$  such that  $C$  is blocked on  $\pi_{XY}$  given  $\mathbf{Z}$ , but open given  $\mathbf{Z} \cup W$ . Then  $X\pi_{XC}C$  is open given  $\mathbf{Z}$ , and  $W$  is a descendant of  $C$ . Let  $C\pi_{CW}W$  be the (possibly empty) directed path from  $C$  to  $W$ , and let  $W\pi_{WY}Y$  be the subpath of  $\pi_{CY}$  from  $W$  to  $Y$ . Since  $C$  is blocked on  $\pi_{XY}$  given  $\mathbf{Z}$ , no variable on  $\pi_{CW}$  can be in  $\mathbf{Z}$ . But then  $X\pi_{XC}C\pi_{CW}W\pi_{WY}Y$  is an open path from  $X$  and  $Y$  given  $\mathbf{Z}$  in  $\mathcal{G}_{\overline{X}}$ . Contradiction, since  $\mathbf{Z}$  is a backdoor set. Thus,  $W$  does not open any backdoor paths, and  $\mathbf{Z} \cup W$  is also a backdoor set.

Finally,  $W$  is not independent of  $Y$  given  $\mathbf{Z}$  in  $\mathcal{G}_{\overline{X}}$ , since  $W\pi_{WY}Y$  is open given  $\mathbf{Z}$ .  $\square$

**Theorem 3.4.** We assume that  $P_x$  and  $\mathcal{G}_{\overline{X}}$  are faithful to each other. Every causal Markov boundary  $\mathbf{Z}$  of an outcome variable  $Y$  w.r.t a treatment variable  $X$  is a subset of the Markov boundary  $\text{MB}(Y)$ .

*Proof.* We will show this by contradiction. Specifically, we will show that any set  $\mathbf{Z}$  that includes variables  $\mathbf{Q}$  not in the Markov boundary of  $Y$  cannot satisfy one of the Conditions (2) or (3) of the causal Markov boundary.

Assume that  $\mathbf{Z}$  is a causal Markov boundary for  $Y$  with respect to  $X$ , and let  $\mathbf{W} = \mathbf{Z} \setminus X$ . Let  $\mathbf{Q} = \mathbf{W} \setminus \text{MB}(Y)$  be the non-empty subset of  $\mathbf{W}$  that is not a part of the Markov boundary of  $Y$ .

If there exists no  $Q \in \mathbf{Q}$  that has an  $m$ -connecting path  $Q\pi_{QY}Y$  to  $Y$  given  $\mathbf{W} \setminus Q$ , then  $\mathbf{Q} \perp\!\!\!\perp Y | (\mathbf{W} \setminus \mathbf{Q})$  in  $\mathcal{G}_{\overline{X}}$ . Conditioning on  $X$  cannot open any paths from  $X$  to  $Y$ ; therefore,  $\mathbf{Q} \perp\!\!\!\perp Y | X, (\mathbf{W} \setminus \mathbf{Q})$  in  $\mathcal{G}_{\overline{X}}$ . Then by Rule 1 of the do-calculus [Pearl, 2000],  $P(Y|do(X), \mathbf{W}) = P(Y|do(X), \mathbf{W} \setminus \mathbf{Q})$ , and  $\mathbf{Z}$  does not satisfy Condition (3) of the causal Markov boundary definition (Contradiction).

If there exists a  $Q \in (\mathbf{W} \setminus \text{MB}(Y))$  that has an  $m$ -connecting path  $Q\pi_{QY}Y$  with  $Y$  given  $\mathbf{Z} \setminus Q$ , then by Lemma 1.7, there exists a variable  $W$  in  $\text{MB}(Y) \setminus \mathbf{Z}$  such that  $\mathbf{Z} \cup W$  is also a backdoor set, and  $W \not\perp\!\!\!\perp Y | X, \mathbf{Z}$  in  $\mathcal{G}_{\overline{X}}$ . Then  $P(Y|do(X), \mathbf{Z}, W) \neq P(Y|do(X), \mathbf{Z})$ . Thus,  $\mathbf{Z}$  does not satisfy Condition (2) of the Causal Markov boundary definition (Contradiction).

Thus,  $\mathbf{Z}$  cannot include any variables that are not in the Markov boundary of  $Y$ .  $\square$

**Theorem 3.5.** Let  $\mathcal{G}$  be a SMCM over  $X, Y, \mathbf{V}$  with  $\mathbf{V}$  occurring before  $X$  and  $Y$ . Let  $\mathbf{Z} \subseteq \mathbf{V} \cup X$  be the IMB of  $Y$  relative to  $X$ . If  $\mathbf{Z}$  is a causal Markov boundary, then  $\text{MB}(Y) = \mathbf{Z}$ .

*Proof.*  $\text{MB}_X(Y) \subseteq \text{MB}(Y)$ , so we need to show that  $\text{MB}(Y) \subseteq \text{MB}_X(Y)$  when  $\text{MB}_X(Y) \in \mathbf{CMB}_X(Y)$ . Assume that  $\mathbf{Z}$  is both the  $\text{MB}_X(Y)$  and a causal Markov boundary, but there exists a variable  $Q$  in  $\mathbf{Z}$  that is not in  $\text{MB}(Y)$ . Then  $Q$  is reachable from  $Y$  through a bidirected path in  $\mathcal{G}$  but not in  $\mathcal{G}_{\overline{X}}$ . Since  $\mathcal{G}$  and  $\mathcal{G}_{\overline{X}}$  only differ in edges that are into  $X$ , this path must be going through an edge that is incoming into  $X$ . Thus,  $\mathcal{G}$  includes a bidirected path  $Y \leftrightarrow \dots \leftrightarrow X$ , and every variable on this path is in  $\text{MB}_X(Y) = \mathbf{Z}$ . But then  $\mathbf{Z} \setminus X$  cannot be a backdoor set, and by Theorem 3.3  $\mathbf{Z}$  cannot be a causal Markov boundary. Contradiction. Thus, the Markov boundary of  $Y$  cannot include any more variables than  $\mathbf{Z}$ .  $\square$

## 2 CONVERGENCE PROOF FOR OBSERVATIONAL MARKOV BOUNDARY (OMB)

*Definition 2.1* (Conditional Entropy). Let  $P$  be the full joint probability distribution over a set of variables  $\mathbf{V}$ , let  $Y \in \mathbf{V}$  be a variable, and let  $\mathbf{Z} \subseteq \mathbf{V} \setminus \{Y\}$  be a set of variables. Then, the conditional entropy of  $Y$  given  $\mathbf{Z}$  is defined as follows [Cover, 1999]:

$$H(Y|\mathbf{Z}) = - \sum_y \sum_z P(y, z) \cdot \log P(y|z) \quad (\text{S1})$$

where  $y$  and  $z$  denote the values of  $Y$  and  $\mathbf{Z}$ , respectively.

**Lemma 2.2.** Let  $X, Y \in \mathbf{V}$  be two variables and  $\mathbf{Z} \subseteq \mathbf{V} \setminus \{X, Y\}$  be a set of variables. Then,  $H(Y|\mathbf{Z}) \geq H(Y|X, \mathbf{Z})$ , where the entropies are defined by Definition 2.1, and the equality holds if and only if  $Y \perp\!\!\!\perp X|\mathbf{Z}$ .

*Proof.* Applying the chain rule of entropy, the conditional mutual information can be computed as follows [Cover, 1999]:

$$I(X; Y|\mathbf{Z}) = H(Y|\mathbf{Z}) - H(Y|X, \mathbf{Z}). \quad (\text{S2})$$

Given that the mutual information is nonnegative (i.e.,  $I(X; Y|\mathbf{Z}) \geq 0$ ) and  $I(X; Y|\mathbf{Z}) = 0$  if and only if  $Y \perp\!\!\!\perp X|\mathbf{Z}$  (see [Cover, 1999], page 29), it follows that:

$$\begin{aligned} H(Y|\mathbf{Z}) - H(Y|X, \mathbf{Z}) &\geq 0 \\ H(Y|\mathbf{Z}) &\geq H(Y|X, \mathbf{Z}), \end{aligned} \quad (\text{S3})$$

where the equality holds if and only if  $Y \perp\!\!\!\perp X|\mathbf{Z}$ . □

For brevity, let  $\mathbf{V} = \{\mathbf{V} \cup X\}$ , where  $X$  is a treatment variable, and let  $Y$  be an outcome variable in the remainder of this section.

**Lemma 2.3.** All Markov blankets of  $Y$  have the same entropy.

*Proof.* By definition,  $\mathbf{Z}'$  is the Markov blanket of  $Y$  if and only if  $P(Y|\mathbf{Z}', \mathbf{W}) = P(Y|\mathbf{Z}')$  for any  $\mathbf{W} \subseteq \mathbf{V} \setminus \mathbf{Z}'$ , which indicates that  $Y \perp\!\!\!\perp \mathbf{W}|\mathbf{Z}'$ . Also, according to Lemma 2.2,  $H(Y|\mathbf{Z}') = H(Y|\mathbf{Z}', \mathbf{W})$  for any  $\mathbf{W} \subseteq \mathbf{V} \setminus \mathbf{Z}'$ . Let  $\mathbf{Z}$  also be a Markov blanket of  $Y$ . By multiple applications of Lemma 2.2, we obtain:

$$H(Y|\mathbf{Z}') = H(Y|\mathbf{Z}', \mathbf{V} \setminus \mathbf{Z}') = H(Y|\mathbf{V}) = H(Y|\mathbf{Z}, \mathbf{V} \setminus \mathbf{Z}') = H(Y|\mathbf{Z}) \quad (\text{S4})$$

□

**Lemma 2.4.** Let  $\mathbf{Z}'$  be a Markov blanket of  $Y$  and let  $\mathbf{Z}$  be a set of variables that is not a Markov blanket of  $Y$ . Then,  $H(Y|\mathbf{Z}') < H(Y|\mathbf{Z})$ , where the entropies are defined by Definition 2.1.

*Proof.* Assume there exists a set  $\mathbf{W} \subseteq \mathbf{V} \setminus \mathbf{Z}$  such that  $P(Y|\mathbf{Z}, \mathbf{W}) \neq P(Y|\mathbf{Z})$ . According to Lemma 2.2 we have:

$$H(Y|\mathbf{Z}, \mathbf{W}) < H(Y|\mathbf{Z}). \quad (\text{S5})$$

Also, given that  $\mathbf{V}$  is a superset of  $(\mathbf{Z} \cup \mathbf{W})$ , we have:

$$H(Y|\mathbf{V}) \leq H(Y|\mathbf{Z}, \mathbf{W}). \quad (\text{S6})$$

Therefore,

$$H(Y|\mathbf{V}) < H(Y|\mathbf{Z}). \quad (\text{S7})$$

Also, since  $\mathbf{Z}'$  is a Markov blanket of  $Y$ , by Lemma 2.3 we have:

$$H(Y|\mathbf{Z}') = H(Y|\mathbf{V}). \quad (\text{S8})$$

Combining Equations (S7) and (S8), we obtain:

$$H(Y|\mathbf{Z}') < H(Y|\mathbf{Z}). \quad (\text{S9})$$

□

**Lemma 2.5.** Given dataset  $D_o$  that contains samples from a strictly positive distribution  $P$ , which is a perfect map for a SMCM  $\mathcal{G}$ , the BD score [Heckerman et al., 1995] for  $\log P(D_o|\mathbf{Z})$  is defined as follows in the large sample limit:

$$\lim_{N \rightarrow \infty} \log P(D_o|\mathbf{Z}) = \lim_{N \rightarrow \infty} -N \cdot H(Y|\mathbf{Z}) - \frac{q \cdot (r-1)}{2} \log N + \text{const.}, \quad (\text{S10})$$

*Proof.* The BD score for  $P(D_o|\mathbf{Z})$  is calculated as follows [Heckerman et al., 1995]:

$$P(D_o|\mathbf{Z}) = \prod_{j=1}^q \frac{\Gamma(\alpha_j)}{\Gamma(\alpha_j + N_j)} \cdot \prod_{k=1}^r \frac{\Gamma(\alpha_{jk} + N_{jk})}{\Gamma(\alpha_{jk})}, \quad (\text{S11})$$

where  $q$  denotes instantiations of variables in  $\mathbf{Z}$  and  $r$  denotes values of variable  $Y$ . The term  $N_{jk}$  is the number of cases in data in which variable  $Y = k$  and its parent  $\mathbf{Z} = j$ ; also,  $N_j = \sum_{k=1}^r N_{jk}$ . The term  $\alpha_{jk}$  is a finite positive real number that is called Dirichlet prior parameter and may be interpreted as representing ‘‘pseudo-counts’’, where  $\alpha_j = \sum_{k=1}^r \alpha_{jk}$ . BD can be re-written in  $\log$  form as follows:

$$\log P(D_o|\mathbf{Z}) = \sum_{j=1}^q \left[ \log \Gamma(\alpha_j) - \log \Gamma(\alpha_j + N_j) + \sum_{k=1}^r [\log \Gamma(\alpha_{jk} + N_{jk}) - \log \Gamma(\alpha_{jk})] \right]. \quad (\text{S12})$$

We can re-arrange the terms in Eq. (S12) to gather the constant terms as follows:

$$\begin{aligned} \log P(D_o|\mathbf{Z}) &= \sum_{j=1}^q \left[ -\log \Gamma(\alpha_j + N_j) + \sum_{k=1}^r \log \Gamma(\alpha_{jk} + N_{jk}) \right] + \sum_{j=1}^q \left[ \log \Gamma(\alpha_j) - \sum_{k=1}^r \log \Gamma(\alpha_{jk}) \right] \\ &= \sum_{j=1}^q \left[ -\log \Gamma(\alpha_j + N_j) + \sum_{k=1}^r \log \Gamma(\alpha_{jk} + N_{jk}) \right] + \text{const.} \end{aligned} \quad (\text{S13})$$

Using the Stirling’s approximation of  $\lim_{n \rightarrow \infty} \log \Gamma(n) = (n - \frac{1}{2}) \log(n) - n + \text{const.}$ , we can re-write Eq. (S13) as follows:

$$\begin{aligned} \lim_{N \rightarrow \infty} \log P(D_o|\mathbf{Z}) &= \lim_{N \rightarrow \infty} \sum_{j=1}^q \left[ -(\alpha_j + N_j - \frac{1}{2}) \log(\alpha_j + N_j) + (\alpha_j + N_j) \right. \\ &\quad \left. + \sum_{k=1}^r \left( (\alpha_{jk} + N_{jk} - \frac{1}{2}) \log(\alpha_{jk} + N_{jk}) - (\alpha_{jk} + N_{jk}) \right) \right] + \text{const.} \\ &= \lim_{N \rightarrow \infty} \sum_{j=1}^q \left[ -\alpha_j \log(\alpha_j + N_j) - N_j \log(\alpha_j + N_j) + \frac{1}{2} \log(\alpha_j + N_j) + \alpha_j + N_j \right. \\ &\quad \left. + \sum_{k=1}^r \left( \alpha_{jk} \log(\alpha_{jk} + N_{jk}) + N_{jk} \log(\alpha_{jk} + N_{jk}) - \frac{1}{2} \log(\alpha_{jk} + N_{jk}) - \alpha_{jk} - N_{jk} \right) \right] + \text{const.} \\ &= \lim_{N \rightarrow \infty} \sum_{j=1}^q \left[ -N_j \log(\alpha_j + N_j) + \sum_{k=1}^r N_{jk} \log(\alpha_{jk} + N_{jk}) \right] + \sum_{j=1}^q \left[ -\alpha_j \log(\alpha_j + N_j) + \sum_{k=1}^r \alpha_{jk} \log(\alpha_{jk} + N_{jk}) \right] \\ &\quad + \frac{1}{2} \sum_{j=1}^q \left[ \log(\alpha_j + N_j) - \sum_{k=1}^r \log(\alpha_{jk} + N_{jk}) + \alpha_j + N_j - \sum_{k=1}^r (\alpha_{jk} + N_{jk}) \right] + \text{const.} \\ &= \lim_{N \rightarrow \infty} \sum_{j=1}^q \left[ -N_j \log(\alpha_j + N_j) + \sum_{k=1}^r N_{jk} \log(\alpha_{jk} + N_{jk}) \right] + \sum_{j=1}^q \left[ -\alpha_j \log(\alpha_j + N_j) + \sum_{k=1}^r \alpha_{jk} \log(\alpha_{jk} + N_{jk}) \right] \\ &\quad + \frac{1}{2} \sum_{j=1}^q \left[ \log(\alpha_j + N_j) - \sum_{k=1}^r \log(\alpha_{jk} + N_{jk}) \right] + \text{const.} \end{aligned} \quad (\text{S14})$$

In the last step of Eq. (S14), we used the facts that  $\sum_{k=1}^r N_{jk} = N_j$  and  $\sum_{k=1}^r \alpha_{jk} = \alpha_j$ , and we applied these identities again to that equation to obtain the following:

$$\begin{aligned} \lim_{N \rightarrow \infty} \log P(D_o|\mathbf{Z}) &= \\ \lim_{N \rightarrow \infty} \sum_{j=1}^q \sum_{k=1}^r \left[ N_{jk} \log\left(\frac{\alpha_{jk} + N_{jk}}{\alpha_j + N_j}\right) + \alpha_{jk} \log\left(\frac{\alpha_{jk} + N_{jk}}{\alpha_j + N_j}\right) \right] &+ \frac{1}{2} \sum_{j=1}^q \left[ \log(\alpha_j + N_j) - \sum_{k=1}^r \log(\alpha_{jk} + N_{jk}) \right] + \text{const.} \end{aligned} \quad (\text{S15})$$

Given that

$$\lim_{N \rightarrow \infty} \frac{\alpha_{jk} + N_{jk}}{\alpha_j + N_j} = \frac{N_{jk}}{N_j}$$

and

$$\lim_{N \rightarrow \infty} \sum_{j=1}^q \sum_{k=1}^r \alpha_{jk} \log\left(\frac{\alpha_{jk} + N_{jk}}{\alpha_j + N_j}\right) = \text{const.},$$

in the limit, Eq. (S15) becomes:

$$\lim_{N \rightarrow \infty} \log P(D_o | \mathbf{Z}) = \lim_{N \rightarrow \infty} \sum_{j=1}^q \sum_{k=1}^r N_{jk} \log \frac{N_{jk}}{N_j} + \frac{1}{2} \sum_{j=1}^q \left[ \log(\alpha_j + N_j) - \sum_{k=1}^r \log(\alpha_{jk} + N_{jk}) \right] + \text{const.}, \quad (\text{S16})$$

or equivalently:

$$\begin{aligned} \lim_{N \rightarrow \infty} \log P(D_o | \mathbf{Z}) &= \lim_{N \rightarrow \infty} N \cdot \sum_{j=1}^q \sum_{k=1}^r \frac{N_{jk}}{N} \log \frac{N_{jk}}{N_j} + \frac{1}{2} \sum_{j=1}^q \left[ \log(\alpha_j + N_j) - \sum_{k=1}^r \log(\alpha_{jk} + N_{jk}) \right] + \text{const.} \\ &= \lim_{N \rightarrow \infty} -N \cdot H(Y | \mathbf{Z}) + \frac{1}{2} \sum_{j=1}^q \left[ \log(\alpha_j + N_j) - \sum_{k=1}^r \log(\alpha_{jk} + N_{jk}) \right] + \text{const.} \end{aligned} \quad (\text{S17})$$

To simplify the second term in Eq. (S17), we divide the arguments in the log terms by  $N$  and equivalently add  $\log N$  terms as follows:

$$\begin{aligned} \lim_{N \rightarrow \infty} \frac{1}{2} \sum_{j=1}^q \left[ \log(\alpha_j + N_j) - \sum_{k=1}^r \log(\alpha_{jk} + N_{jk}) \right] \\ &= \lim_{N \rightarrow \infty} \frac{1}{2} \sum_{j=1}^q \left[ \log\left(\frac{\alpha_j + N_j}{N}\right) + \log N - \sum_{k=1}^r \log\left(\frac{\alpha_{jk} + N_{jk}}{N}\right) + \log N \right] \\ &= \lim_{N \rightarrow \infty} \frac{1}{2} \sum_{j=1}^q \left( \log N - \sum_{k=1}^r \log N \right) + \frac{1}{2} \sum_{j=1}^q \left[ \log\left(\frac{\alpha_j + N_j}{N}\right) - \sum_{k=1}^r \log\left(\frac{\alpha_{jk} + N_{jk}}{N}\right) \right] \\ &= -\frac{q(r-1)}{2} \log N + \text{const.} \end{aligned} \quad (\text{S18})$$

Combining Equations (S17) and (S18), we obtain:

$$\lim_{N \rightarrow \infty} \log P(D_o | \mathbf{Z}) = \lim_{N \rightarrow \infty} -N \cdot H(Y | \mathbf{Z}') - \frac{q \cdot (r-1)}{2} \log N + \text{const.} \quad (\text{S19})$$

□

**Theorem 4.2.** Given dataset  $D_o$  that contains samples from a strictly positive distribution  $P$ , which is a perfect map for a SMCM  $\mathcal{G}$ , the BD score [Heckerman et al., 1995] will assign the highest score to the OMB of  $Y$  in the large sample limit.

*Proof.* Let  $\mathbf{Z}'$  be the OMB of  $Y$  and  $\mathbf{Z} \subseteq \mathbf{V}$  be an arbitrary set. We want to show that:

$$\lim_{N \rightarrow \infty} \frac{P(D_o | \mathbf{Z})}{P(D_o | \mathbf{Z}')} = \begin{cases} 1 & \text{iff } \mathbf{Z} \text{ is an OMB of } Y \\ 0 & \text{otherwise} \end{cases}, \quad (\text{S20})$$

Applying Lemma 2.5 we have:

$$\lim_{N \rightarrow \infty} \log \frac{P(D_o | \mathbf{Z})}{P(D_o | \mathbf{Z}')} = \lim_{N \rightarrow \infty} N \cdot [H(Y | \mathbf{Z}') - H(Y | \mathbf{Z})] + \frac{(q' - q) \cdot (r-1)}{2} \log N. \quad (\text{S21})$$

where  $q$  and  $q'$  are the number of possible parent instantiations of  $Y$  with  $\mathbf{Z}$  and  $\mathbf{Z}'$  as the set of parents. There are three possible cases:

**Case 1:**  $\mathbf{Z}$  is a Markov blanket of  $Y$  and its OMB.

Since both  $\mathbf{Z}'$  and  $\mathbf{Z}$  are Markov blankets of  $Y$ ,  $H(Y|\mathbf{Z}) = H(Y|\mathbf{Z}')$  by Lemma 2.3. Thus, the first term in Eq. (S21) becomes 0. Also, given that  $\mathbf{Z}'$  and  $\mathbf{Z}$  are OMBs, they have the same number of parameters  $q' = q$ , by which the second term in Eq. (S21) becomes 0 in the limit as  $N \rightarrow \infty$ , or equivalently Eq. (S20) approaches to 1.

**Case 2:**  $\mathbf{Z}$  is a Markov blanket of  $Y$  but not its OMB.

According to Lemma 2.3  $H(Y|\mathbf{Z}) = H(Y|\mathbf{Z}')$ ; therefore, the first term in Eq. (S21) becomes 0 and we obtain:

$$\lim_{N \rightarrow \infty} \frac{P(D_o|\mathbf{Z})}{P(D_o|\mathbf{Z}')} = \lim_{N \rightarrow \infty} \frac{(q' - q) \cdot (r - 1)}{2} \log N. \quad (\text{S22})$$

Given that  $\mathbf{Z}'$  is the OMB with minimum number of variables, and therefore, minimum number of parameters  $q' < q$ . Thus, the term  $(q' - q)$  becomes a negative constant. Also, the term  $\frac{(r-1)}{2}$  is a positive constant. Consequently, Eq. (S22) goes to  $-\infty$  in the limit as  $N \rightarrow \infty$ , which implies that Eq. (S20) approaches to 0.

**Case 3:**  $\mathbf{Z}$  is not a Markov blanket of  $Y$ .

The first term in Eq. (S21) is of  $O(N)$  and dominates the second term, which is  $O(\log N)$ . According to Lemma 2.4,  $H(Y|\mathbf{Z}') < H(Y|\mathbf{Z})$ ; thus, the term  $H(Y|\mathbf{Z}') - H(Y|\mathbf{Z})$  becomes a negative number. As a result, Eq. (S21) becomes  $-\infty$ , which equivalently implies that Eq. (S20) becomes 0.  $\square$

## References

- Thomas M Cover. *Elements of Information Theory*. John Wiley & Sons, 1999.
- David Heckerman, Dan Geiger, and David M Chickering. Learning Bayesian networks: The combination of knowledge and statistical data. *Machine Learning*, 20(3):197–243, 1995.
- Leonard Henckel, Emilija Perković, and Marloes H. Maathuis. Graphical criteria for efficient total effect estimation via adjustment in causal linear models. *arXiv preprint arXiv:1907.02435*, 2019.
- J Pearl. *Causality: Models, Reasoning and Inference*. Cambridge University Press, 2000.
- Thomas Richardson, Peter Spirtes, et al. Ancestral graph Markov models. *The Annals of Statistics*, 30(4):962–1030, 2002.
- Ilya Shpitser and Judea Pearl. Identification of joint interventional distributions in recursive semi-Markovian causal models. In *Proceedings of the 21st National Conference on Artificial Intelligence*, pages 1219–1226, 2006.
